# Supplementary material for: Conserved Genetic Interactions between Ciliopathy Complexes Cooperatively Support Ciliogenesis and Ciliary Signaling
Source: PubMed Central journal article supplement (PMC4635004; doi:10.1371/journal.pgen.1005627), 2015-11-05

**A**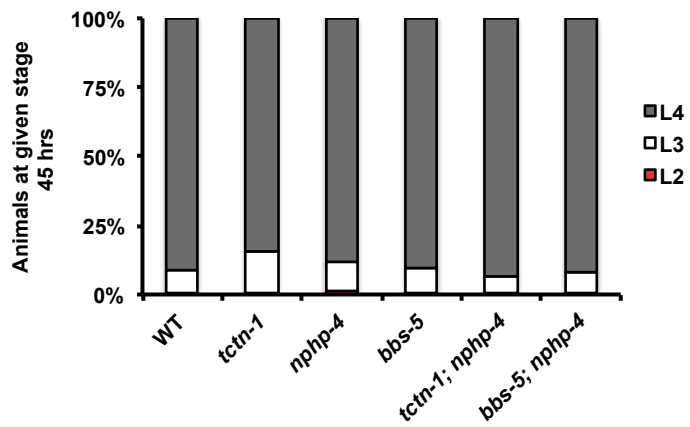**B**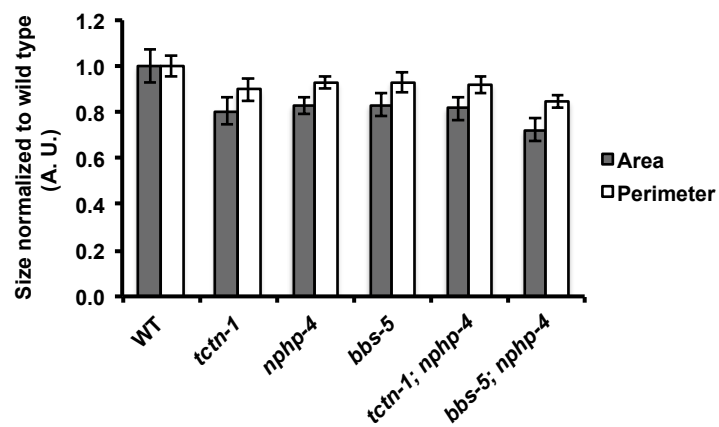**C**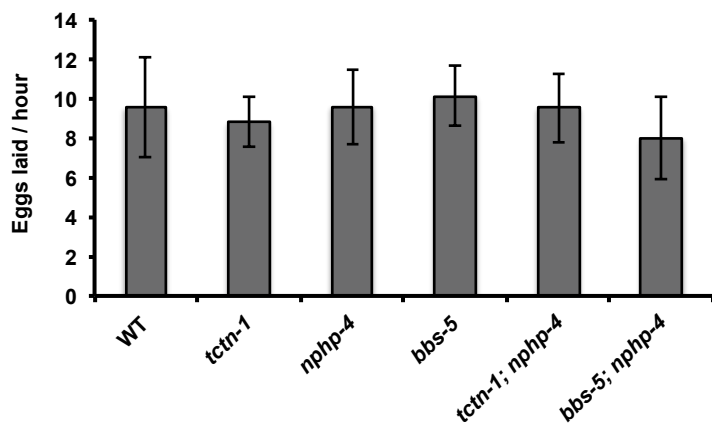**D**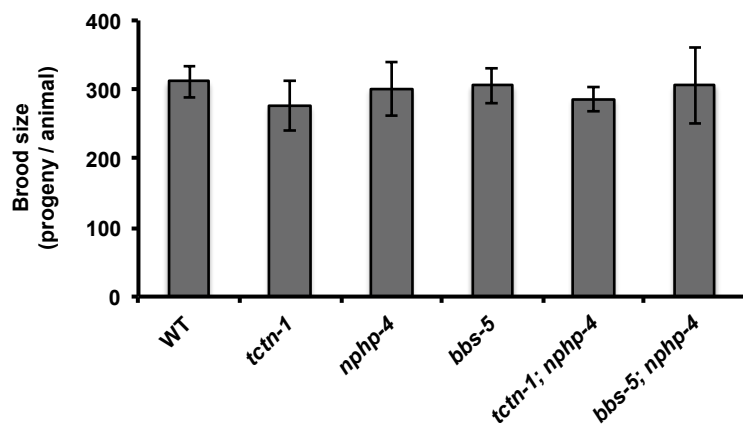**E**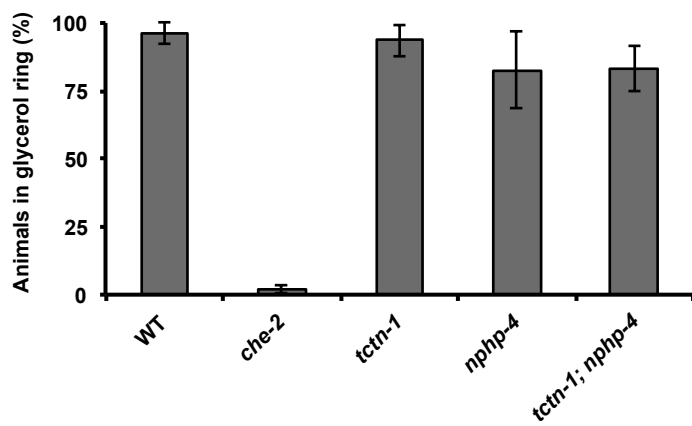**F**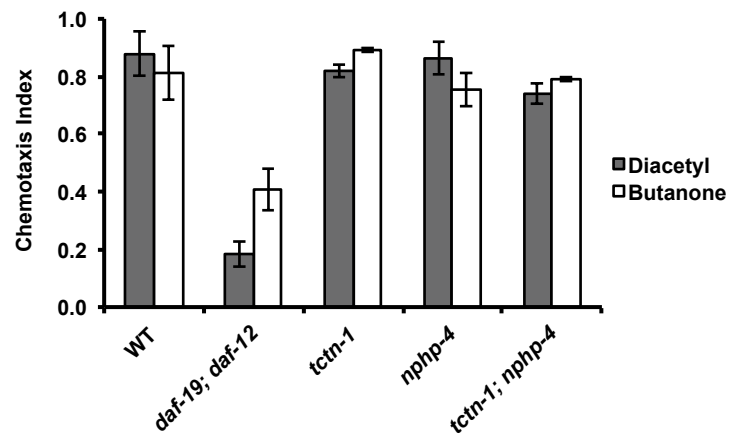

Supplement: pgen.1005627.s002.pdf [file pgen.1005627.s002.pdf]
