# Supplementary material for: Conserved Genetic Interactions between Ciliopathy Complexes Cooperatively Support Ciliogenesis and Ciliary Signaling
Source: PubMed Central journal article supplement (PMC4635004; doi:10.1371/journal.pgen.1005627), 2015-11-05
Supplement: pgen.1005627.s005.pdf [file pgen.1005627.s005.pdf]

| Genotype                                                      | Forelimbs (%) |          |          | Total forelimbs examined | Hindlimbs (%) |          |          | Total hindlimbs examined |
|---------------------------------------------------------------|---------------|----------|----------|--------------------------|---------------|----------|----------|--------------------------|
|                                                               | 5 digits      | 6 digits | 7 digits |                          | 5 digits      | 6 digits | 7 digits |                          |
| <b>WT</b>                                                     | 34 (100)      | 0 (0)    | 0 (0)    | 34                       | 34 (100)      | 0 (0)    | 0 (0)    | 34                       |
| <b><i>Tctn1</i><sup>-/-</sup></b>                             | 35 (92)       | 3 (8)    | 0 (0)    | 38                       | 2 (5)         | 35 (92)  | 1 (3)    | 38                       |
| <b><i>Tctn2</i><sup>-/-</sup></b>                             | 8 (67)        | 4 (33)   | 0 (0)    | 12                       | 0 (0)         | 12 (100) | 0 (0)    | 12                       |
| <b><i>Cc2d2a</i><sup>-/-</sup></b>                            | 14 (100)      | 0 (0)    | 0 (0)    | 14                       | 2 (14)        | 12 (86)  | 0 (0)    | 24                       |
| <b><i>Nphp4</i><sup>n/n</sup></b>                             | 36 (100)      | 0 (0)    | 0 (0)    | 36                       | 36 (100)      | 0 (0)    | 0 (0)    | 36                       |
| <b><i>Nphp1</i><sup>-/-</sup></b>                             | 28 (100)      | 0 (0)    | 0 (0)    | 28                       | 28 (100)      | 0 (0)    | 0 (0)    | 28                       |
| <b><i>Tctn1</i><sup>-/-</sup> <i>Tctn2</i><sup>-/-</sup></b>  | 17 (94)       | 1 (6)    | 0 (0)    | 18                       | 1 (6)         | 17 (94)  | 0 (0)    | 18                       |
| <b><i>Tctn1</i><sup>-/-</sup> <i>Nphp4</i><sup>n/n</sup></b>  | 4 (17)        | 15 (62)  | 5 (21)   | 24                       | 0 (0)         | 21 (88)  | 3 (12)   | 24                       |
| <b><i>Tctn1</i><sup>-/-</sup> <i>Nphp1</i><sup>-/-</sup></b>  | 8 (33)        | 16 (67)  | 0 (0)    | 24                       | 0 (0)         | 24 (100) | 0 (0)    | 24                       |
| <b><i>Cc2d2a</i><sup>-/-</sup> <i>Nphp4</i><sup>n/n</sup></b> | 1 (12)        | 5 (63)   | 2 (25)   | 8                        | 1 (12)        | 7 (88)   | 0 (0)    | 8                        |
