# Supplementary material for: Conserved Genetic Interactions between Ciliopathy Complexes Cooperatively Support Ciliogenesis and Ciliary Signaling
Source: PubMed Central journal article supplement (PMC4635004; doi:10.1371/journal.pgen.1005627), 2015-11-05
Supplement: pgen.1005627.s006.pdf [file pgen.1005627.s006.pdf]

| <b>Genotype</b>                                              | <b>Embryos with exencephaly (%)</b> |
|--------------------------------------------------------------|-------------------------------------|
| <b>WT</b>                                                    | 0/17 (0)                            |
| <b><i>Tctn1</i><sup>-/-</sup></b>                            | 0/19 (0)                            |
| <b><i>Nphp4</i><sup>n/n</sup></b>                            | 0/18 (0)                            |
| <b><i>Nphp1</i><sup>-/-</sup></b>                            | 0/14 (0)                            |
| <b><i>Tctn1</i><sup>-/-</sup> <i>Nphp4</i><sup>n/n</sup></b> | 2/12 (17)                           |
| <b><i>Tctn1</i><sup>-/-</sup> <i>Nphp1</i><sup>-/-</sup></b> | 5/12 (42)                           |
