# Supplementary material for: Conserved Genetic Interactions between Ciliopathy Complexes Cooperatively Support Ciliogenesis and Ciliary Signaling
Source: PubMed Central journal article supplement (PMC4635004; doi:10.1371/journal.pgen.1005627), 2015-11-05
Supplement: pgen.1005627.s007.pdf [file pgen.1005627.s007.pdf]

| Genotype                                                    | Forelimbs (%) |          |          | Total forelimbs<br>examined | Hindlimbs (%) |          |          | Total hindlimbs<br>examined |
|-------------------------------------------------------------|---------------|----------|----------|-----------------------------|---------------|----------|----------|-----------------------------|
|                                                             | 5 digits      | 6 digits | 7 digits |                             | 5 digits      | 6 digits | 7 digits |                             |
| <b>WT</b>                                                   | 12 (100)      | 0 (0)    | 0 (0)    | 12                          | 12 (100)      | 0 (0)    | 0 (0)    | 12                          |
| <b><i>Tctn1</i><sup>-/-</sup></b>                           | 8 (100)       | 0 (0)    | 0 (0)    | 8                           | 2 (20)        | 8 (80)   | 0 (0)    | 10                          |
| <b><i>Bbs1</i><sup>-/-</sup></b>                            | 12 (100)      | 0 (0)    | 0 (0)    | 12                          | 12 (100)      | 0 (0)    | 0 (0)    | 12                          |
| <b><i>Tctn1</i><sup>-/-</sup> <i>Bbs1</i><sup>-/-</sup></b> | 0 (0)         | 4 (67)   | 2 (33)   | 6                           | 0 (0)         | 6 (100)  | 0 (0)    | 6                           |
