# Supplementary material for: Conserved Genetic Interactions between Ciliopathy Complexes Cooperatively Support Ciliogenesis and Ciliary Signaling
Source: PubMed Central journal article supplement (PMC4635004; doi:10.1371/journal.pgen.1005627), 2015-11-05
Supplement: pgen.1005627.s008.pdf [file pgen.1005627.s008.pdf]

| <b>Genotype</b>                                             | <b>Embryos with exencephaly (%)</b> |
|-------------------------------------------------------------|-------------------------------------|
| <b>WT</b>                                                   | 0/6 (0)                             |
| <b><i>Tctn1</i><sup>-/-</sup></b>                           | 0/5 (0)                             |
| <b><i>Bbs1</i><sup>-/-</sup></b>                            | 0/6 (0)                             |
| <b><i>Tctn1</i><sup>-/-</sup> <i>Bbs1</i><sup>-/-</sup></b> | 2/3 (67)                            |
