# Supplementary material for: Conserved Genetic Interactions between Ciliopathy Complexes Cooperatively Support Ciliogenesis and Ciliary Signaling
Source: PubMed Central journal article supplement (PMC4635004; doi:10.1371/journal.pgen.1005627), 2015-11-05
Supplement: pgen.1005627.s009.pdf [file pgen.1005627.s009.pdf]

| Strain | Genotype                                                                                                                    |
|--------|-----------------------------------------------------------------------------------------------------------------------------|
| N2     | wild type                                                                                                                   |
| KQ2175 | <i>tctn-1(ok3021)</i> IV                                                                                                    |
| KQ1456 | <i>nphp-4(tm925)</i> V                                                                                                      |
| KQ2206 | <i>nphp-1(ok500)</i> II                                                                                                     |
| KQ2333 | <i>mks-1(tm2705)</i> III                                                                                                    |
| KQ2209 | <i>mksr-1(ok2092)</i> X                                                                                                     |
| KQ2245 | <i>mksr-2(tm2452)</i> IV                                                                                                    |
| KQ2185 | <i>mks-3(tm2547)</i> II                                                                                                     |
| KQ2187 | <i>tctn-1(ok3021)</i> IV; <i>nphp-4(tm925)</i> V                                                                            |
| KQ2232 | <i>nphp-1(ok500)</i> II; <i>tctn-1(ok3021)</i> IV                                                                           |
| KQ2372 | <i>mks-1(tm2705)</i> III; <i>tctn-1(ok3021)</i> IV                                                                          |
| KQ2233 | <i>tctn-1(ok3021)</i> IV; <i>mksr-1(ok2092)</i> X                                                                           |
| KQ2290 | <i>mksr-2(tm2452)</i> IV; <i>tctn-1(ok3021)</i> IV                                                                          |
| KQ2188 | <i>mks-3(tm2547)</i> II; <i>tctn-1(ok3021)</i> IV                                                                           |
| KQ1681 | <i>bbs-5(gk507)</i> III                                                                                                     |
| KQ2544 | <i>bbs-5(gk507)</i> III; <i>nphp-4(tm925)</i> V                                                                             |
| KQ2545 | <i>bbs-5(gk507)</i> III; <i>tctn-1(ok3021)</i> IV                                                                           |
| KQ2547 | <i>nphp-1(ok500)</i> II; <i>bbs-5(gk507)</i> III                                                                            |
| KQ2548 | <i>bbs-5(gk507)</i> III; <i>mksr-1(ok2092)</i> X                                                                            |
| CB1033 | <i>che-2(e1033)</i> X                                                                                                       |
| JT6924 | <i>daf-19(m86)</i> II; <i>daf-12(sa204)</i> X                                                                               |
| PT709  | <i>nphp-4(tm925)</i> <i>him-5(e1490)</i> V                                                                                  |
| MX1758 | N2; nxEx[P <i>bbs-8::tctn-1::gfp</i> + Posm-5:: <i>xbx-1::tdTomato</i> + <i>rol-6(su1006)</i> ]                             |
| YH372  | N2; Ex[ <i>mksr-1::cfp</i> + <i>che-13::yfp</i> + <i>rol-6(su1006)</i> ]                                                    |
| MX1674 | <i>nphp-4</i> ; nxEx[ <i>mksr-1::cfp</i> + <i>che-13::yfp</i> + <i>rol-6(su1006)</i> ]                                      |
| MX1723 | <i>tctn-1</i> ; nxEx[ <i>mksr-1::cfp</i> + <i>che-13::yfp</i> + <i>rol-6(su1006)</i> ]                                      |
| MX1726 | <i>tctn-1</i> ; <i>nphp-4</i> ; nxEx[ <i>mksr-1::cfp</i> + <i>che-13::yfp</i> + <i>rol-6(su1006)</i> ]                      |
| YH751  | N2; yhEx419[Posm-5:: <i>mks-6::gfp</i> + Posm-5:: <i>xbx-1::tdTomato</i> + <i>rol-6(su1006)</i> ]                           |
| YH776  | <i>nphp-4</i> ; yhEx419[Posm-5:: <i>mks-6::gfp</i> + Posm-5:: <i>xbx-1::tdTomato</i> + <i>rol-6(su1006)</i> ]               |
| MX1675 | <i>tctn-1</i> ; nxEx[Posm-5:: <i>mks-6::gfp</i> + Posm-5:: <i>xbx-1::tdTomato</i> + <i>rol-6(su1006)</i> ]                  |
| MX1727 | <i>tctn-1</i> ; <i>nphp-4</i> ; nxEx[Posm-5:: <i>mks-6::gfp</i> + Posm-5:: <i>xbx-1::tdTomato</i> + <i>rol-6(su1006)</i> ]  |
| MX1388 | N2; nxEx[ <i>arl-13::gfp</i> + Posm-5:: <i>xbx-1::tdTomato</i> + <i>rol-6(su1006)</i> ]                                     |
| MX1751 | <i>nphp-4</i> ; nxEx[ <i>arl-13::gfp</i> + Posm-5:: <i>xbx-1::tdTomato</i> + <i>rol-6(su1006)</i> ]                         |
| MX1725 | <i>tctn-1</i> ; nxEx[ <i>arl-13::gfp</i> + Posm-5:: <i>xbx-1::tdTomato</i> + <i>rol-6(su1006)</i> ]                         |
| MX1728 | <i>tctn-1</i> ; <i>nphp-4</i> ; nxEx[ <i>arl-13::gfp</i> + Posm-5:: <i>xbx-1::tdTomato</i> + <i>rol-6(su1006)</i> ]         |
| YH930  | N2; Ex[Posm-5:: <i>mks-5::tdTomato</i> + Posm-5:: <i>dyf-11::gfp</i> + <i>rol-6(su1006)</i> ]                               |
| MX1219 | <i>nphp-4</i> ; nxEx[Posm-5:: <i>mks-5::tdTomato</i> + Posm-5:: <i>dyf-11::gfp</i> + <i>rol-6(su1006)</i> ]                 |
| MX1722 | <i>tctn-1</i> ; nxEx[Posm-5:: <i>mks-5::tdTomato</i> + Posm-5:: <i>dyf-11::gfp</i> + <i>rol-6(su1006)</i> ]                 |
| MX1750 | <i>tctn-1</i> ; <i>nphp-4</i> ; nxEx[Posm-5:: <i>mks-5::tdTomato</i> + Posm-5:: <i>dyf-11::gfp</i> + <i>rol-6(su1006)</i> ] |
| YH224  | N2; Ex[ <i>nphp-4::yfp</i> + <i>che-13::cfp</i> + <i>rol-6(su1006)</i> ]                                                    |
| MX1721 | <i>tctn-1</i> ; nxEx[ <i>nphp-4::yfp</i> + <i>che-13::cfp</i> + <i>rol-6(su1006)</i> ]                                      |
| MX1420 | N2; nxEx[P <i>bbs-8::tram-1::tdTomato</i> + P <i>bbs-8::mks-2::gfp</i> + <i>rol-6(su1006)</i> ]                             |
| MX1724 | <i>tctn-1</i> ; nxEx[P <i>bbs-8::tram-1::tdTomato</i> + P <i>bbs-8::mks-2::gfp</i> + <i>rol-6(su1006)</i> ]                 |
| CX3344 | <i>kyls53[odr-10::GFP]</i> X                                                                                                |
| KQ2643 | <i>nphp-4(tm925)</i> V; <i>kyls53[odr-10::GFP]</i> X                                                                        |
| KQ2644 | <i>tctn-1(ok3021)</i> IV; <i>kyls53[odr-10::GFP]</i> X                                                                      |
| KQ2645 | <i>tctn-1(ok3021)</i> IV; <i>nphp-4(tm925)</i> V; <i>kyls53[odr-10::GFP]</i> X                                              |
